# Supplementary material for: ATP-dependent conformational dynamics in a photoactivated adenylate cyclase revealed by fluorescence spectroscopy and small-angle X-ray scattering
Source: PubMed Central journal article supplement (PMC10837130; doi:10.1038/s42003-024-05842-1), 2024-02-02
Supplement: 42003_2024_5842_MOESM2_ESM.pdf [file 42003_2024_5842_MOESM2_ESM.pdf]

## **Description of Additional Supplementary Files**

**File name:** Supplementary Movie 1

**Description:** Buffer molecules arriving at the cover slide of the MP set up.

**File name:** Supplementary Movie 2

**Description:** Potential single molecules of OaPAC arriving at the cover slide of the MP set up.
